# Supplementary material for: Comparative Analysis of Plant Growth-Promoting Rhizobacteria’s Effects on Alfalfa Growth at the Seedling and Flowering Stages under Salt Stress
Source: MDPI journal article supplement (doi:10.3390/microorganisms12030616), 2024-03-19
Supplement: s1 [file s1]

**Table S1. Independent rhizobacteria and their growth-promoting traits**

| Halophyte                | Strain No. | Growth promoting traits                                                                         |                                                               |                                                                    |
|--------------------------|------------|-------------------------------------------------------------------------------------------------|---------------------------------------------------------------|--------------------------------------------------------------------|
|                          |            | Nitrogenase<br>activity (nmolC <sub>2</sub> H <sub>4</sub> ·h <sup>-1</sup> ·mL <sup>-1</sup> ) | Phosphate<br>solubilization ability<br>(µg·mL <sup>-1</sup> ) | Indole-3-acetic acid<br>(IAA) production<br>(µg·mL <sup>-1</sup> ) |
| <i>Tamarix chinensis</i> | HL1        | 13.47                                                                                           | 3.43                                                          | -                                                                  |
| <i>Tamarix chinensis</i> | HL2        | -                                                                                               | 3.79                                                          | 10.33                                                              |
| <i>Tamarix chinensis</i> | HL3        | -                                                                                               | 35.94                                                         | 11.07                                                              |
| <i>Tamarix chinensis</i> | HL4        | -                                                                                               | 154.90                                                        | 1.96                                                               |
| <i>Tamarix chinensis</i> | HL5        | -                                                                                               | 45.25                                                         | 3.49                                                               |
| <i>Tamarix chinensis</i> | HL6        | -                                                                                               | 233.47                                                        | -                                                                  |
| <i>Tamarix chinensis</i> | HL7        | -                                                                                               | 4.6                                                           | -                                                                  |
| <i>Tamarix chinensis</i> | HL8        | -                                                                                               | 14.9                                                          | -                                                                  |
| <i>Tamarix chinensis</i> | HL9        | 14.03                                                                                           | -                                                             | -                                                                  |
| <i>Tamarix chinensis</i> | HL10       | 65.68                                                                                           | -                                                             | 9.68                                                               |
| <i>Tamarix chinensis</i> | HL11       | 50.78                                                                                           | -                                                             | -                                                                  |

---

|                          |      |        |   |       |
|--------------------------|------|--------|---|-------|
| <i>Tamarix chinensis</i> | HL12 | 59.39  | - | 23.03 |
| <i>Tamarix chinensis</i> | HL13 | 126.35 | - | -     |
| <i>Tamarix chinensis</i> | HL14 | 119.73 | - | -     |
| <i>Tamarix chinensis</i> | HL15 | 157.68 | - | -     |
| <i>Tamarix chinensis</i> | HL16 | 47.27  | - | 11.72 |
| <i>Tamarix chinensis</i> | HL17 | -      | - | 3.91  |
| <i>Tamarix chinensis</i> | HL18 | -      | - | 11.54 |
| <i>Tamarix chinensis</i> | HL19 | -      | - | 27.91 |
| <i>Tamarix chinensis</i> | HL20 | -      | - | 8.42  |
| <i>Tamarix chinensis</i> | HL21 | -      | - | 4.98  |
| <i>Tamarix chinensis</i> | HL22 | -      | - | 10.93 |
| <i>Tamarix chinensis</i> | HL23 | -      | - | 17.44 |
| <i>Tamarix chinensis</i> | HL24 | 11.16  | - | 12.05 |
| <i>Tamarix chinensis</i> | HL25 | -      | - | 18.23 |

---

|                          |      |        |       |        |
|--------------------------|------|--------|-------|--------|
| <i>Tamarix chinensis</i> | HL26 | -      | -     | 15.17  |
| <i>Tamarix chinensis</i> | HL27 | -      | -     | 5.49   |
| <i>Tamarix chinensis</i> | HL28 | -      | -     | 8.37   |
| <i>Tamarix chinensis</i> | HL29 | -      | -     | 18.23  |
| <i>Tamarix chinensis</i> | HL30 | -      | -     | 3.40   |
| <i>Tamarix chinensis</i> | HL31 | -      | -     | 2.23   |
| <i>Tamarix chinensis</i> | HL32 | -      | -     | 3.17   |
| <i>Lycium ruthenicum</i> | HG1  | -      | -     | -      |
| <i>Lycium ruthenicum</i> | HG2  | -      | 20.32 | -      |
| <i>Lycium ruthenicum</i> | HG3  | 117.66 | -     | 4.10   |
| <i>Lycium ruthenicum</i> | HG4  | 123.64 | -     | -      |
| <i>Lycium ruthenicum</i> | HG5  | 40.09  | -     | -      |
| <i>Lycium ruthenicum</i> | HG6  | 75.73  | -     | 0.0072 |
| <i>Lycium ruthenicum</i> | HG7  | 107.14 | -     | 0.89   |

---

|                          |      |        |      |       |
|--------------------------|------|--------|------|-------|
| <i>Lycium ruthenicum</i> | HG8  | 210.53 | 3.7  | -     |
| <i>Lycium ruthenicum</i> | HG9  | 94.38  | -    | 21.4  |
| <i>Lycium ruthenicum</i> | HG10 | 201.69 | -    | -     |
| <i>Lycium ruthenicum</i> | HG11 | 72.94  | -    | 2.84  |
| <i>Lycium ruthenicum</i> | HG12 | 289.01 | 2.97 | -     |
| <i>Lycium ruthenicum</i> | HG13 | 28.06  | -    | 4.14  |
| <i>Lycium ruthenicum</i> | HG14 | 42.88  | -    | 4.56  |
| <i>Lycium ruthenicum</i> | HG15 | -      | -    | 5.07  |
| <i>Lycium ruthenicum</i> | HG16 | -      | -    | 6.75  |
| <i>Lycium ruthenicum</i> | HG17 | -      | -    | 6.42  |
| <i>Lycium ruthenicum</i> | HG18 | -      | -    | 5.07  |
| <i>Lycium ruthenicum</i> | HG19 | -      | -    | 7.03  |
| <i>Lycium ruthenicum</i> | HG20 | -      | -    | 5.35  |
| <i>Lycium ruthenicum</i> | HG21 | -      | -    | 25.17 |

|                          |      |       |       |       |
|--------------------------|------|-------|-------|-------|
| <i>Lycium ruthenicum</i> | HG22 | -     | -     | 0.23  |
| <i>Lycium ruthenicum</i> | HG23 | -     | -     | 10.93 |
| <i>Lycium ruthenicum</i> | HG24 | -     | 39.88 | 30.01 |
| <i>Kalidium foliatum</i> | YZ1  | 38.42 | -     | -     |
| <i>Kalidium foliatum</i> | YZ2  | 79.63 | -     | -     |
| <i>Kalidium foliatum</i> | YZ3  | 90.95 | -     | -     |
| <i>Kalidium foliatum</i> | YZ4  | -     | -     | 8.79  |
| <i>Kalidium foliatum</i> | YZ5  | 95.10 | -     | -     |
| <i>Kalidium foliatum</i> | YZ6  | -     | -     | 3.86  |
